# Supplementary material for: A Transcriptomic Atlas of the Ectomycorrhizal Fungus Laccaria bicolor
Source: MDPI journal article supplement (doi:10.3390/microorganisms9122612), 2021-12-17

Mean transcription – MMN – control

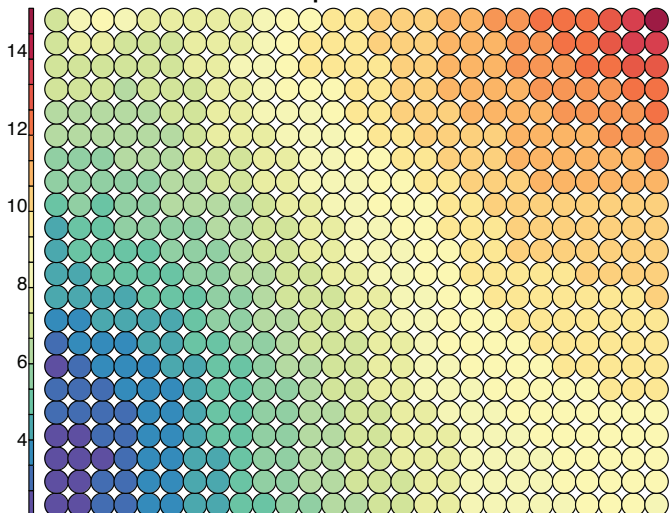

Mean transcription – Carbon High

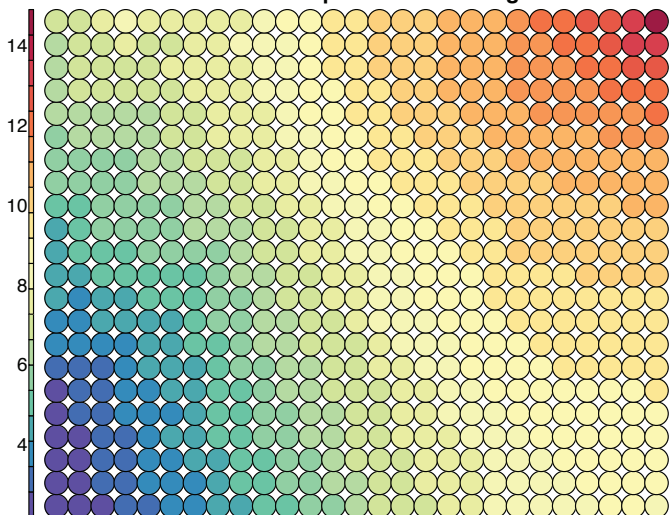

Mean transcription – Carbon Low

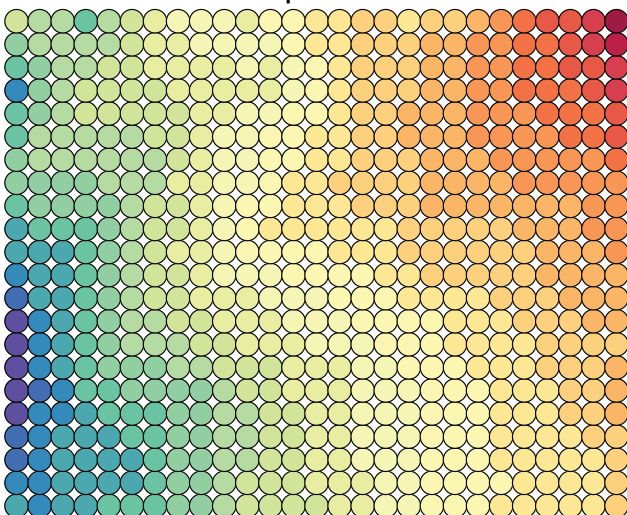

Mean transcription – Nitrogen High

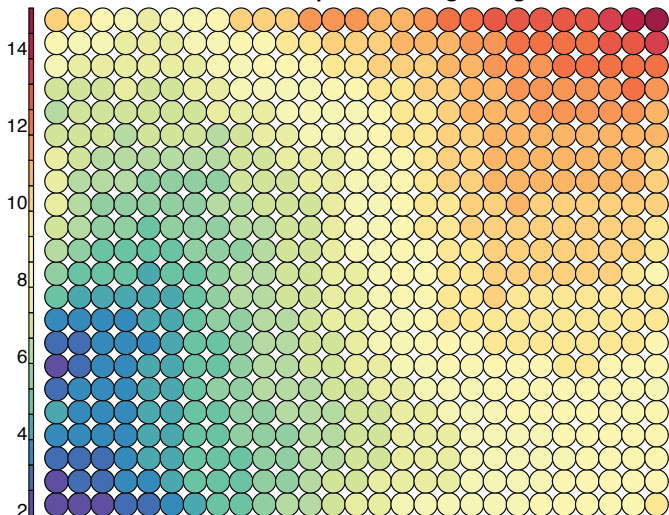

Mean transcription – Nitrogen Low

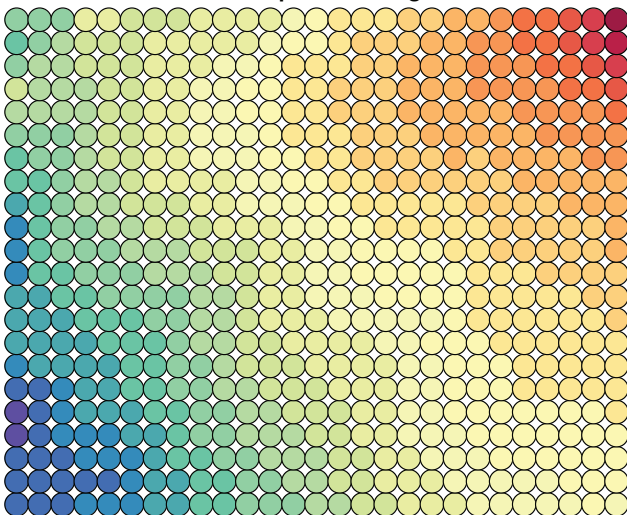

Mean transcription – Phosphate High

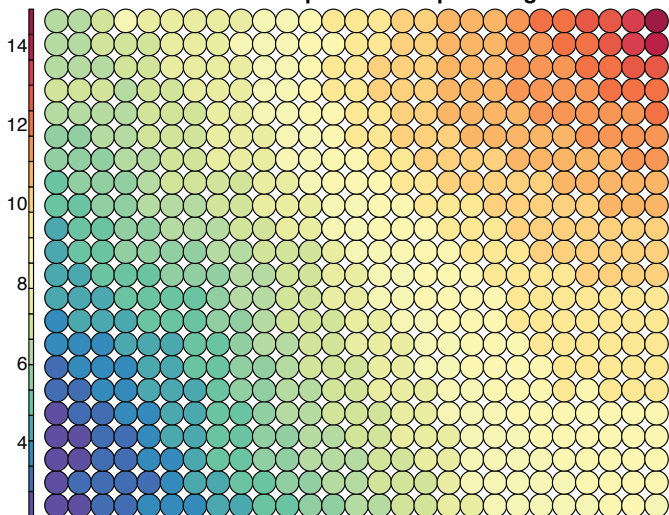

Mean transcription – Phosphate Low

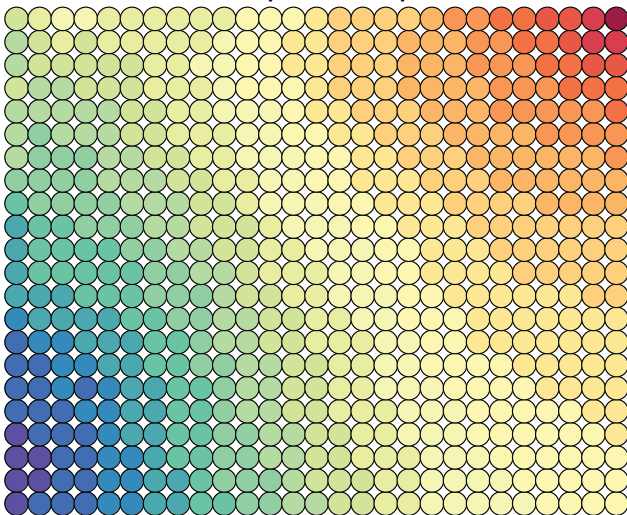

Supplement: s1 [file s1]
