# Supplementary material for: A Transcriptomic Atlas of the Ectomycorrhizal Fungus Laccaria bicolor
Source: MDPI journal article supplement (doi:10.3390/microorganisms9122612), 2021-12-17
Supplement: s1 [file s1]

C

| Cluster     | TOP10 GO   | TOP10 GO terms                                                |
|-------------|------------|---------------------------------------------------------------|
| Red         | GO:0006355 | regulation of transcription                                   |
|             | GO:0006096 | glycolytic process                                            |
|             | GO:0009268 | response to pH                                                |
|             | GO:0051090 | regulation of DNA-binding transcription factor activity       |
|             | GO:0006526 | arginine biosynthetic process                                 |
|             | GO:0006419 | alanyl-tRNA aminoacylation                                    |
|             | GO:0006438 | valyl-tRNA aminoacylation                                     |
|             | GO:0042351 | de novo' GDP-L-fucose biosynthetic process                    |
|             | GO:0009156 | ribonucleoside monophosphate biosynthetic process             |
| Green       | GO:0006003 | fructose 2,6-bisphosphate metabolic process                   |
|             | GO:0006355 | regulation of transcription                                   |
|             | GO:0007040 | lysosome organization                                         |
|             | GO:0035023 | regulation of Rho protein signal transduction                 |
|             | GO:0008154 | actin polymerization or depolymerization                      |
|             | GO:0006665 | sphingolipid metabolic process                                |
|             | GO:0015904 | tetracycline transport                                        |
|             | GO:0015947 | methane metabolic process                                     |
|             | GO:0009439 | cyanate metabolic process                                     |
| Orange      | GO:0046677 | response to antibiotic                                        |
|             | GO:0051056 | regulation of small GTPase mediated signal transduction       |
|             | GO:0009253 | peptidoglycan catabolic process                               |
|             | GO:0016998 | cell wall macromolecule catabolic process                     |
|             | GO:0006597 | spermine biosynthetic process                                 |
|             | GO:0008295 | spermidine biosynthetic process                               |
|             | GO:0006097 | glyoxylate cycle                                              |
|             | GO:0006437 | tyrosyl-tRNA aminoacylation                                   |
|             | GO:0051341 | regulation of oxidoreductase activity                         |
| Magenta     | GO:0006730 | one-carbon metabolic process                                  |
|             | GO:0005975 | carbohydrate metabolic process                                |
|             | GO:0006032 | chitin catabolic process                                      |
|             | GO:0006468 | protein phosphorylation                                       |
|             | GO:0006629 | lipid metabolic process                                       |
|             | GO:0042742 | defense response to bacterium                                 |
|             | GO:0050832 | defense response to fungus                                    |
|             | GO:0007131 | reciprocal meiotic recombination                              |
|             | GO:0017183 | peptidyl-diphthamide biosynthetic process                     |
| Blue        | GO:0008643 | carbohydrate transport                                        |
|             | GO:0006412 | translation                                                   |
|             | GO:0042254 | ribosome biogenesis                                           |
|             | GO:0015986 | ATP synthesis coupled proton transport                        |
|             | GO:0006334 | nucleosome assembly                                           |
|             | GO:0016071 | mRNA metabolic process                                        |
|             | GO:0006457 | protein folding                                               |
|             | GO:0045454 | cell redox homeostasis                                        |
|             | GO:0006414 | translational elongation                                      |
| Yellow      | GO:0006122 | mitochondrial electron transport, ubiquinol to cytochrome c   |
|             | GO:0045900 | negative regulation of translational elongation               |
|             | GO:0008152 | metabolic process                                             |
|             | GO:0031119 | tRNA pseudouridine synthesis                                  |
|             | GO:0008610 | lipid biosynthetic process                                    |
|             | GO:0000272 | polysaccharide catabolic process                              |
|             | GO:0006807 | nitrogen compound metabolic process                           |
|             | GO:0006108 | malate metabolic process                                      |
|             | GO:0043044 | ATP-dependent chromatin remodeling                            |
| Turquoise   | GO:0031554 | regulation of DNA-templated transcription, termination        |
|             | GO:0000290 | deadenylation-dependent decapping of nuclear-transcribed mRNA |
|             | GO:0008643 | carbohydrate transport                                        |
|             | GO:0006066 | alcohol metabolic process                                     |
|             | GO:0019430 | removal of superoxide radicals                                |
|             | GO:0006562 | proline catabolic process                                     |
|             | GO:0006014 | D-ribose metabolic process                                    |
|             | GO:0006788 | heme oxidation                                                |
|             | GO:0006725 | cellular aromatic compound metabolic process                  |
| Light green | GO:0006537 | glutamate biosynthetic process                                |
|             | GO:0016310 | phosphorylation                                               |
|             | GO:0006810 | transport                                                     |
|             | GO:0007172 | signal complex assembly                                       |
|             | GO:0006298 | mismatch repair                                               |
|             | GO:0006571 | tyrosine biosynthetic process                                 |
|             | GO:0015931 | nucleobase-containing compound transport                      |
|             | GO:0009058 | biosynthetic process                                          |
|             | GO:0006760 | folic acid-containing compound metabolic process              |
|             | GO:0055070 | copper ion homeostasis                                        |
|             | GO:0006559 | L-phenylalanine catabolic process                             |
