# Supplementary material for: A Transcriptomic Atlas of the Ectomycorrhizal Fungus Laccaria bicolor
Source: MDPI journal article supplement (doi:10.3390/microorganisms9122612), 2021-12-17
Supplement: s1 [file s1]

A

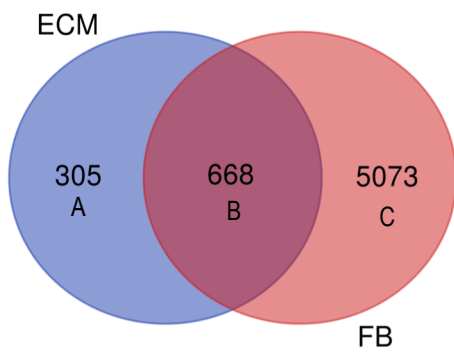

B

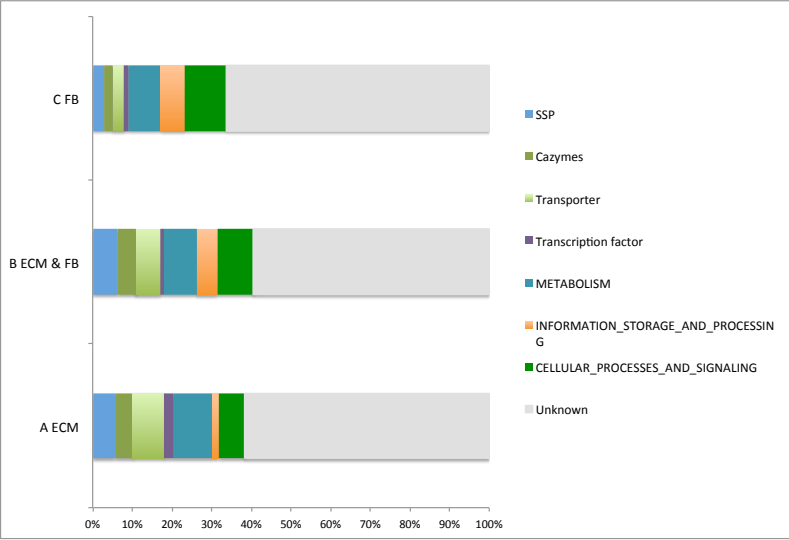

C

| GO.ID      | GO | Term                                        | A ECM up | B ECM & FB up | C FB up |
|------------|----|---------------------------------------------|----------|---------------|---------|
| GO:0006066 | BP | alcohol metabolic process                   |          | 0.02136       |         |
| GO:0006865 | BP | amino acid transport                        |          | 0.0001        |         |
| GO:0015986 | BP | ATP synthesis coupled proton transport      |          |               | 0.01479 |
| GO:0019722 | BP | calcium-mediated signaling                  |          | 0.032         |         |
| GO:0005975 | BP | carbohydrate metabolic process              |          | 0.0239        | 0.00393 |
| GO:0008643 | BP | carbohydrate transport                      | 0.037    |               |         |
| GO:0016998 | BP | cell wall macromolecule catabolic processes |          | 0.014         |         |
| GO:0006952 | BP | defense response                            | 0.038    |               |         |
| GO:0008152 | BP | metabolic process                           |          |               | 0.02141 |
| GO:0006120 | BP | mitochondrial electron transport, NADH t... |          |               | 0.00819 |
| GO:0009116 | BP | nucleoside metabolic process                |          |               | 0.00593 |
| GO:0006334 | BP | nucleosome assembly                         |          |               | 0.00021 |
| GO:0015780 | BP | nucleotide-sugar transmembrane transport    |          |               | 0.03847 |
| GO:0006730 | BP | one-carbon metabolic process                |          |               | 0.00801 |
| GO:0009253 | BP | peptidoglycan catabolic process             |          | 0.003         |         |
| GO:0006813 | BP | potassium ion transport                     |          | 0.0095        |         |
| GO:0006470 | BP | protein dephosphorylation                   |          | 0.0087        |         |
| GO:0006885 | BP | regulation of pH                            |          |               | 0.00819 |
| GO:0006465 | BP | signal peptide processing                   |          |               | 0.00059 |
| GO:0008272 | BP | sulfate transport                           |          | 0.003         |         |
| GO:0006810 | BP | transport                                   | 9.80E-10 | 0.0269        |         |
