# Supplementary material for: A Transcriptomic Atlas of the Ectomycorrhizal Fungus Laccaria bicolor
Source: MDPI journal article supplement (doi:10.3390/microorganisms9122612), 2021-12-17
Supplement: s1 [file s1]

## Figure captions

**Figure S1. Transcriptomic response of *L. bicolor* on different nutritional conditions.** (A) Averaged transcriptomic profiles per condition. Vertical bars indicate transcription level. (B) Condition specific nodes.

**Figure S2. Transcriptomic response of *L. bicolor* at different time points of single culture (FLM) and co-culture with poplar in ectomycorrhizal (EcM) and extrametrical mycelium (ExM).** (A) Averaged transcriptomic profiles per condition. Vertical bars indicate transcription level. (B) Condition specific nodes.

**Figure S3. Expression profiles of previously identified MiSSPs.** (A) Transcription levels at different time points (0,3,7,14,21 days) post-inoculation in extramatrix mycelium (EXT), mycelium surrounding poplar roots (ECM) or mycelium grown in absence of a poplar host (FLM). (B) Normalized gene expression level upon growth in different nutritional conditions and in different functional and morphological structures.

**Figure S4 Transcriptomic response of *L. bicolor* at different stages of sporocarp development.** Condition specific nodes are highlighted

**Figure S5 Differentially expressed genes in early, middle and late stage caps and stipes of *L. bicolor* carpophore.** **A** Double hierarchical clustering of 6070 genes with differential expression in minimum two carpophore stages (fold change  $>\log_2 1$ , FDR  $p\text{-value} < 0.05$ ). Eight cluster with distinct expression pattern are highlighted by colours. Expression values are coloured by minimum and maximum expression per gene. Cap.lt.ave, late cap average gene expression; cap.el.ave, early cap average gene expression; cap.md.ave, medium cap average gene expression; sti.el.ave, early stipe average gene expression; sti.md.ave, medium stipe average gene expression; sti.lt.ave, late stipe average gene expression. **B** Table summarizing % of genes in each of the eight clusters coding for SSPs, Cazymes, Proteases, Lipases or with Cell cycle KOG annotation. **C** TopGO biological process enrichment analysis (Fisher  $p\text{-value} < 0.05$ ) for the eight clusters highlighted in **A**.

**Figure S6 Comparison of ectomycorrhiza (EcM) and fruiting body (FB) up-regulated transcripts compared to free-living mycelium (FLM).** (A) Venn diagram of shared and EcM or FB-only up-regulated transcripts. (B) Functional classification of EcM and FB-shared and EcM and FB-only up-regulated transcripts. SSP small-secreted proteins. (C) Enriched biological process (BP) GO terms identified using TopGO for EcM and FB shared induced transcripts and EcM and FB-only induced transcripts.
