# Supplementary figures and images for: A Transcriptomic Atlas of the Ectomycorrhizal Fungus Laccaria bicolor
Source: MDPI journal article supplement (doi:10.3390/microorganisms9122612), 2021-12-17

# Caps

Early

Middle

Late

CvsS  
Middle

CvsS  
Late

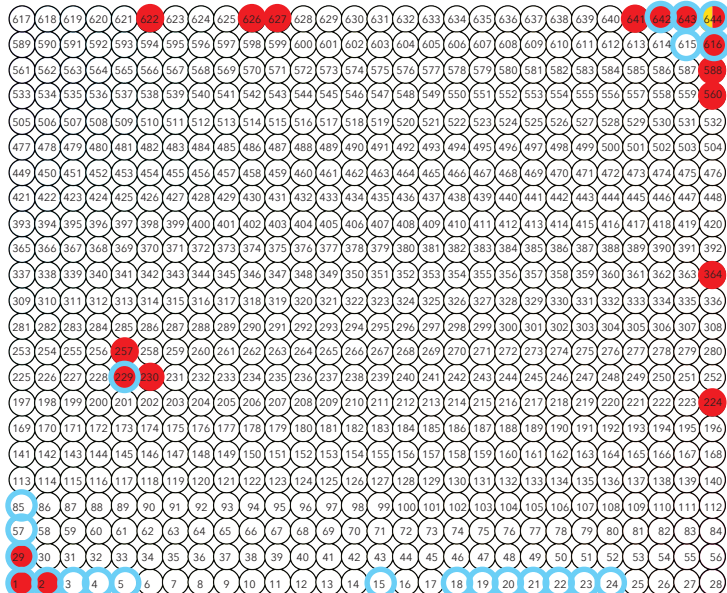

# Stipes

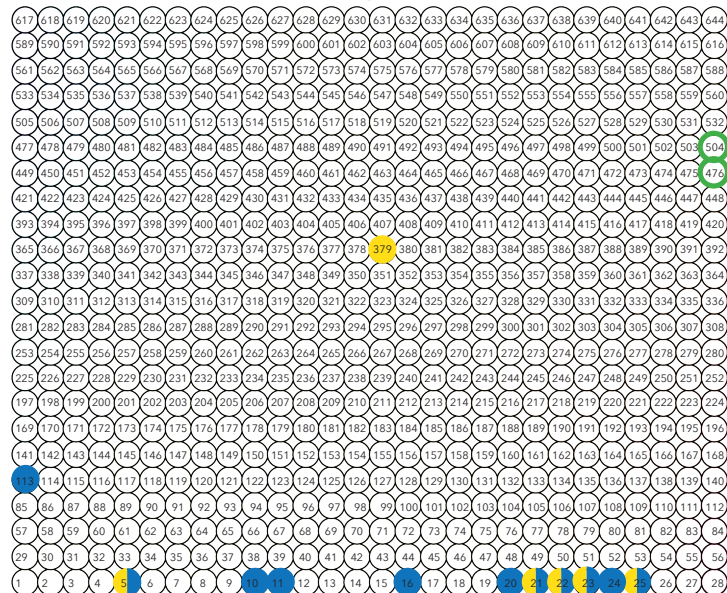

Supplement: s1 [file s1]

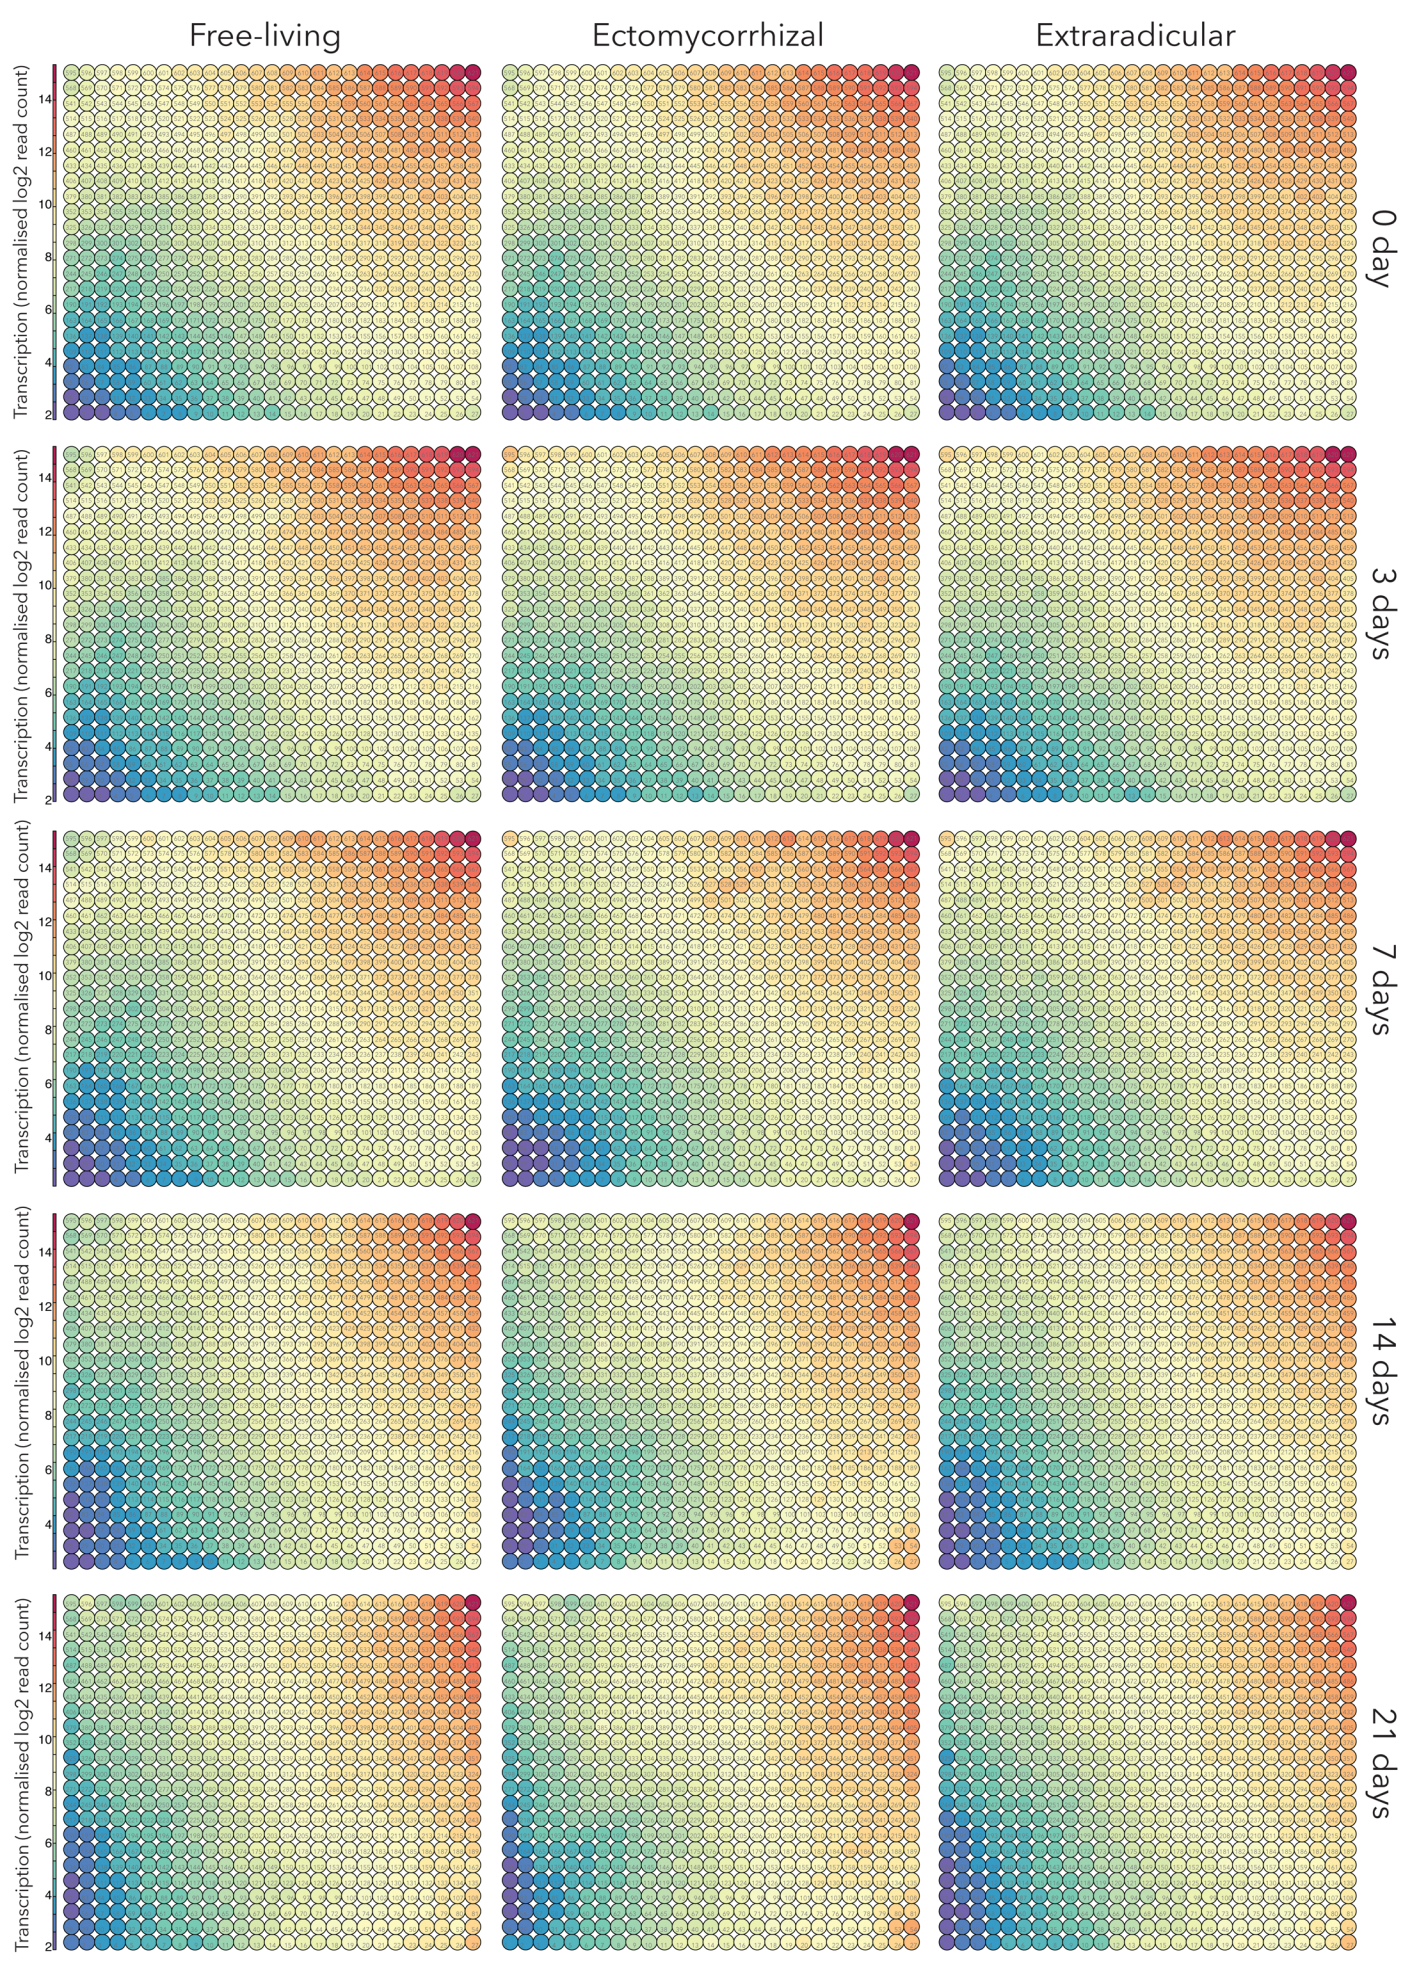

Supplement: s1 [file s1]

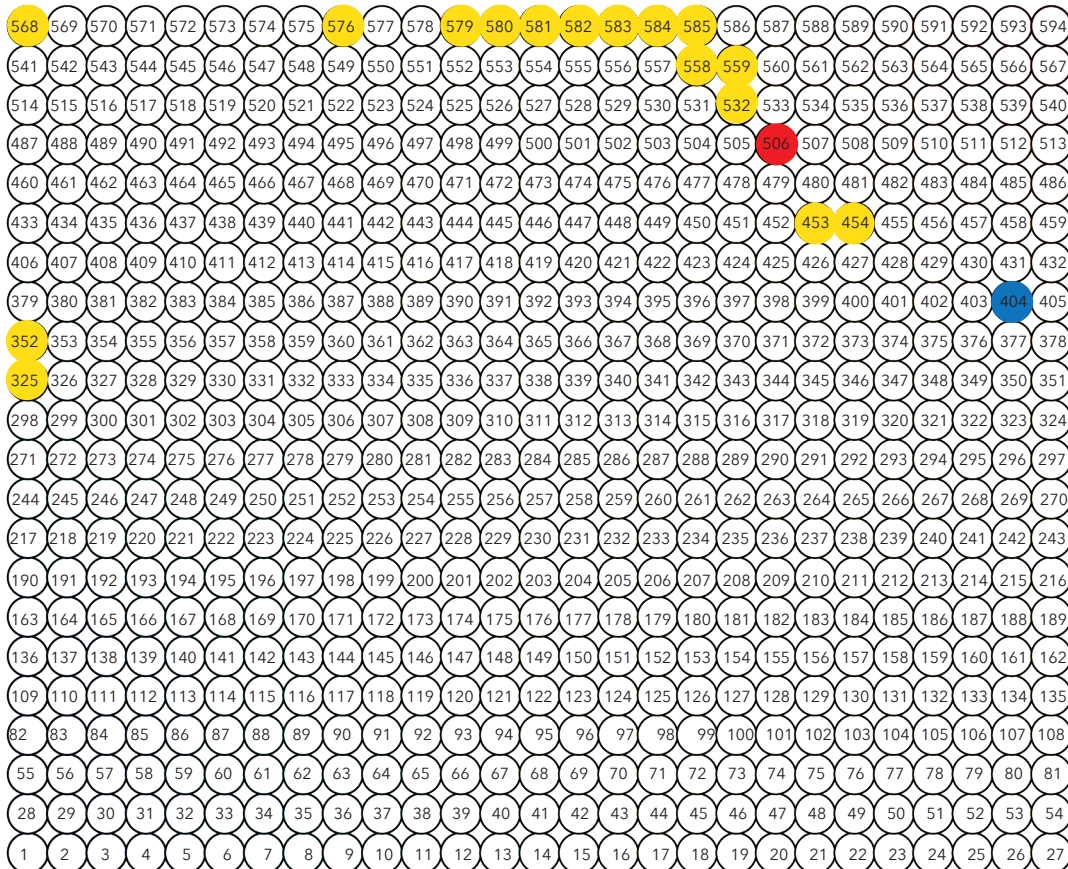

Carbon

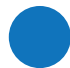

Nitrogen

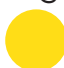

Phosphorus

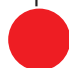

Supplement: s1 [file s1]
